# Supplementary material for: Cytosolic proteins can exploit membrane localization to trigger functional assembly
Source: PLoS Comput Biol. 2018 Mar 5;14(3):e1006031. doi: 10.1371/journal.pcbi.1006031 (PMC5854442; doi:10.1371/journal.pcbi.1006031)
Supplement: S2 Dataset — (XLSX) [file pcbi.1006031.s008.xlsx]

## Sheet: Yeast PMP Interactions
	In vivo behavior				In vivo Inputs for Eq. 3						Inputs Eq. 3		Eq. 3	Eq. 3	Exact solution
Interacting Proteins	Subcellular location, Protein 1 Location	Subcellular location, Protein 1 Location	Possible Membrane Targeted	Lipid Target	Reaction (Cytoplasmic) Volume Volume (um3)	Surface Area Area (um2)	Conc. Protein 1 (uM)	Conc. Protein 2 (uM)	Lipid Conc. (um-2)	[M]0 (uM lipid concentration)	P1-M KD (uM)	P2-M KD (uM)	Enhancement, THEORY Using [M]0	Enhancement, Full THEORY, assuming KaPP=1uM	Enhancement, Simulation with KaPP=1uM	Solution only, %Complexation=[Complex]/Min{[P1]0, [P2]0}. Assuming KaPP=1uM	Full System with recruitment, %Complexation=[Complex]/Min{[P1]0, [P2]0}. Assuming KaPP=1uM	Values used for P1-P2 KD (uM) for simulation and full theory prediction	Notes for the PPI interaction strength	Citation for the PPI interaction	Notes on P-M binding. For lipid binding details and references, see Table S1
OSH2:SWH1	cellular bud neck, cortical endoplasmic reticulum, endoplasmic reticulum, nuclear envelope, plasma membrane	early endosome, endoplasmic reticulum, Golgi trans cisterna, nuclear envelope, nucleus-vacuole junction	LYS/VAC membrane	PI(3,5)P2	37.2	18	0.0379427	0.0225424	9390	7.54479	1	3.5	623.666	621.566	621.571	3.58431	91.3497	1, 0.01	Unknown KaPP. Both are involved in oxysterol binding, and have ankyrin repeats.	Krogan NJ,Nature,2006
			PM	PI(4,5)P2	37.2	76	0.0379427	0.0225424	25000	84.8131	1.1	3	233.396	233.388	233.388	3.58431	81.7529	1, 0.01
			EE	PI(4)P	37.2	8	0.0379427	0.0225424	36765	13.1291	1.3	2.8	1743.91	1741.81	1741.81	3.58431	96.4951	1, 0.01
			Cyt Vesicles	PI(3)P	37.2	8	0.0379427	0.0225424	33088	11.816	1.5	6.2	1353.52	1350.44	1350.45	3.58431	95.5809	1, 0.01
OSH2:OSH2	cellular bud neck, cortical endoplasmic reticulum, endoplasmic reticulum, nuclear envelope, plasma membrane	early endosome, endoplasmic reticulum, Golgi trans cisterna, nuclear envelope, nucleus-vacuole junction	LYS/VAC membrane	PI(3,5)P2	37.2	18	0.0379427	0.0379427	9390	7.54479	1	1	805.844	804.904	804.908	6.62619	88.0057	1, 0.01	Unknown KaPP. Involved in oxysterol binding, and has ankyrin repeats.	Babu M,Nature,2012
			PM	PI(4,5)P2	37.2	76	0.0379427	0.0379427	25000	84.8131	1.1	1.1	238.535	238.533	238.533	6.62619	79.1102	1, 0.01
			EE	PI(4)P	37.2	8	0.0379427	0.0379427	36765	13.1291	1.3	1.3	1925.1	1924.1	1924.11	6.62619	92.0654	1, 0.01
			Cyt Vesicles	PI(3)P	37.2	8	0.0379427	0.0379427	33088	11.816	1.5	1.5	1830.91	1829.59	1829.6	6.62619	91.8716	1, 0.01
SWH1:SWH1	cellular bud neck, cortical endoplasmic reticulum, endoplasmic reticulum, nuclear envelope, plasma membrane	early endosome, endoplasmic reticulum, Golgi trans cisterna, nuclear envelope, nucleus-vacuole junction	LYS/VAC membrane	PI(3,5)P2	37.2	18	0.0225424	0.0225424	9390	7.54479	3.5	3.5	482.725	481.85	481.855	4.21996	80.8959	1, 0.01	Unknown KaPP. Involved in oxysterol binding, and has ankyrin repeats.	Krogan NJ,Nature,2006; Tarassov K,Science,2008
			PM	PI(4,5)P2	37.2	76	0.0225424	0.0225424	25000	84.8131	3	3	228.368	228.363	228.364	4.21996	73.5411	1, 0.01
			EE	PI(4)P	37.2	8	0.0225424	0.0225424	36765	13.1291	2.8	2.8	1579.79	1578.83	1578.84	4.21996	88.9341	1, 0.01
			Cyt Vesicles	PI(3)P	37.2	8	0.0225424	0.0225424	33088	11.816	6.2	6.2	1000.68	999.4	999.412	4.21996	86.299	1, 0.01
KES1:KES1	cellular bud neck, cortical endoplasmic reticulum, endoplasmic reticulum, nuclear envelope, plasma membrane	early endosome, endoplasmic reticulum, Golgi trans cisterna, nuclear envelope, nucleus-vacuole junction	PM	PI(4,5)P2	37.2	76	0.944817	0.944817	25000	84.8131	2.2	2.2	232.568	232.436	232.436	49.0543	95.3414	1, 0.01	Unknown KaPP.	Babu M,Nature,2012
			EE	PI(4)P	37.2	8	0.944817	0.944817	36765	13.1291	0.055	0.055	2305.65	2304.16	2304.16	49.0543	98.4961	1, 0.01
VPS17:SNX4	endosome, retromer complex, retromer, tubulation complex	cytosol, early endosome, extrinsic component of membrane, pre-autophagosomal structure	non-vacuole cytoplasmic vesicles	PI(3)P	37.2	7.5	0.0480756	0.0661988	33088	11.0775	100	100	25.6551	25.4389	25.4401	5.9398	51.2857	1, 0.01	Unknown KaPP. VPS17 is part of a retromer complex that may assemble on membranes to promote vesicle formation. Again, possibly the C terminal domains interact, VPS17 has a CC domain, SNX4 also has a C terminal CC domain that could mediate the interaction, same as VPS5-VPS17.	Vollert CS,Mol Cell Proteomics,2004	KaPM>100uM for both proteins. Used 100 and 300uM
SNX4:SNX41	cytosol, early endosome, extrinsic component of membrane, pre-autophagosomal structure	endosome	non-vacuole cytoplasmic vesicles	PI(3)P	37.2	7.5	0.0661988	0.0163823	33088	11.0775	100	100	25.6551	25.5568	25.5576	6.10533	59.1022	1, 0.01	Unknown KaPP	Ito T,Proc Natl Acad Sci U S A,2001; Hettema EH,EMBO J,2003; Vollert CS,Mol Cell Proteomics,2004; Gavin AC,Nature,2006; Krogan NJ,Nature,2006; Zhang H,J Mol Biol,2009; Brooks MA,Structure,2010; Wang Y,Mol Biol Cell,2012 (8 total references)	KaPM>100uM for both proteins. Used 100 and 300uM
VPS5:VPS17	cytosol, endosome, retromer complex, retromer, tubulation complex	endosome, retromer complex, retromer, tubulation complex	non-vacuole cytoplasmic vesicles	PI(3)P	37.2	7.5	0.0591906	0.0480756	33088	11.0775	100	100	25.6551	25.4531	25.4543	5.34209	47.8423	1, 0.01	Unknown KaPP. VPS17 is part of a retromer complex that may assemble on membranes to promote vesicle formation. VPS17 and VPS5 bind via their C terminal coiled coil domains, independently of their membrane targeting domains (seaman et al)	Horazdovsky BF,Mol Biol Cell,1997; Seaman MN,J Cell Biol,1998; Uetz P,Nature,2000; Reddy JV,Mol Biol Cell,2001; Seaman MN,Mol Biol Cell,2002; Krogan NJ,Nature,2006; Gokool S,Biochem J,2007; Tarassov K,Science,2008; Babu M,Nature,2012 (10 references total)	KaPM>100uM for both proteins. Used 100 and 300uM
ATG20:SNX4	endosome, extrinsic component of membrane, pre-autophagosomal structure	cytosol, early endosome, extrinsic component of membrane, pre-autophagosomal structure	non-vacuole cytoplasmic vesicles	PI(3)P	37.2	7.5	0.0231674	0.0661988	33088	11.0775	100	100	25.6551	25.528	25.5289	6.06838	57.4075	1, 0.01	Unknown KaPP.	Uetz P,Nature,2000; Nice DC,J Biol Chem,2002; Hettema EH,EMBO J,2003; Vollert CS,Mol Cell Proteomics,2004; Gavin AC,Nature,2006; Tarassov K,Science,2008; Yu H,Science,2008; Zhang H,J Mol Biol,2009; Schlecht U,Proc Natl Acad Sci U S A,2012 (9 references total)	KaPM>100uM for both proteins. Used 100 and 300uM
BOI2:CLA4	cellular bud, cellular bud neck, site of polarized growth	cellular bud, fungal-type vacuole, nucleus	LYS/VAC membrane	PI(3,5)P2	37.2	18	0.02531	0.0177215	9394	7.548	6.6	20.2	150.816	150.048	150.051	2.39792	66.2409	1, 0.01	Unknown KaPP. Both are involved in budding at plasma membrane, although both proteins bind PIs promiscuously (Yu et al Mol Cell 2004). Boi2 has two PPI domains, SAM and SH3, CLA4 is a ST Kinase. CLA4 has a long disordered region, ~219-546, that contains putative proline domains. So a possible interactions would be between Boi2's SH3 domain and CLA4's PRD. They also both are not particularly speci…	Drees BL,J Cell Biol,2001; Matsui, Y J Cell Biol 1996; Bender, L J Cell Biol 1996 (3 references total)
			PM	PI(4,5)P2	37.2	75.8	0.02531	0.0177215	25000	84.5899	9.7	20.4	177.642	177.617	177.618	2.39792	69.0633	1, 0.01
BOI2:CLA4			Vacuole OM*	PI(3)P	37.2	18	0.02531	0.0177215	63439	50.9727	19.5	100	253.102	252.931	252.935	2.39792	74.5499	1, 0.01			KaPM>100uM for protein 2. Used 100 and 300uM
CLA4:SKM1	cellular bud, fungal-type vacuole, nucleus	nucleus, plasma membrane	LYS/VAC membrane	PI(3,5)P2	37.2	18	0.0177215	0.000714215	9394	7.548	20.2	6.4	152.964	152.814	152.817	1.76647	72.5265	1, 0.01	Unknown KaPP. Both are S/T kinases, the kinases domains could interact with one another. CLA4 is involved in budding and cytokinesis, SKM1 may also be involved in morphological changes.	Graumann J,Mol Cell Proteomics,2004
			PM	PI(4,5)P2	37.2	75.8	0.0177215	0.000714215	25000	84.5899	20.4	3.9	189.22	189.212	189.213	1.76647	76.5314	1, 0.01
BOI2:BEM1	cellular bud, cellular bud neck, site of polarized growth	cellular bud neck, cellular bud tip, incipient cellular bud site, site of polarized growth	Vacuole OM*	PI(3)P	37.2	18	0.02531	0.0462901	63439	50.9727	19.5	100	253.102	252.852	252.856	4.29937	86.0904	1, 0.01	~1uM (Estimate for a PRD-SH3 interaction PMID14668868, PMID15834155, PMID19590096). Both involved in bud formation, however, BEM1 only binds PI(3)P, which is not on PM generally. So no PM calculation. BEM1 is also involved in Vacuole fusion. Calculate effect at the vacuole (although it is not a known physiologic role for BOI2). The 2nd SH3 domain of BEM1 binds to PRDs on BOI1 and BOI2, (Bender, L…	Bender, L et al J Cell Sci 1996	KaPM>100uM for protein 2. Used 100 and 300uM
BOI1:BEM1	cellular bud, cellular bud neck, site of polarized growth	cellular bud neck, cellular bud tip, incipient cellular bud site, site of polarized growth	Vacuole OM*	PI(3)P	37.2	18	0.02531	0.046	63439	50.9727	20	100	251.326	251.077	251.081	4.29937	86.015	1, 0.01	~1uM (Estimate for a PRD-SH3 interaction PMID14668868, PMID15834155, PMID19590096). Both involved in bud formation, however, BEM1 only binds PI(3)P, which is not on PM generally. So no PM calculation. BEM1 is also involved in Vacuole fusion. Calculate effect at the vacuole (although it is not a known physiologic role for BOI2). The 2nd SH3 domain of BEM1 binds to PRDs on BOI1 and BOI2, (Bender, L…	Bender, L et al J Cell Sci 1996	KaPM>100uM for protein 2. Used 100 and 300uM
BEM1:CLA4	cellular bud neck, cellular bud tip, incipient cellular bud site, site of polarized growth	cellular bud, fungal-type vacuole, nucleus	Vacuole OM*	PI(3)P	37.2	18	0.046	0.0177215	63439	50.9727	100	100	118.679	118.556	118.558	4.32647	79.0237	1, 0.01	Unknown KaPP. Both involved in bud formation, however, BEM1 only binds PI(3)P, which is not on PM generally. So no PM calculation. BEM1 has an SH3 domain, which could potentially bind to a putative PRD on CLA4.	Bose I,J Biol Chem,2001; Tonikian R,PLoS Biol,2009; Hruby A,J Cell Sci,2011; Gorelik M,J Biol Chem,2011; Gorelik M,J Biol Chem,2012 (5 references total)	KaPM>100uM for both proteins. Used 100 and 300uM
VAM7:BEM1	vacuole	cellular bud neck, cellular bud tip, incipient cellular bud site, site of polarized growth	Vacuole OM*	PI(3)P	37.2	18	0.00937407	0.046	63439	50.9727	2.5	100	333.25	333.111	333.115	4.36181	92.6181	1, 0.01	Unknown KaPP. VAM7 is involved in vacoule morphogenesis (possibly fusion), and Xu, JBC 2006 indicate that BEM1 plays a role as well.	Xu H,J Biol Chem,2006	KaPM>100uM for protein 2. Used 100 and 300uM
SLA2:CLA4	actin cortical patch, incipient cellular bud site	cellular bud, fungal-type vacuole, nucleus	PM	PI(4,5)P2	37.2	75.8	0.174269	0.0177215	25000	84.5899	0.27	20.4	197.271	197.184	197.184	14.6296	96.8625	1, 0.01	Unknown KaPP.	Drees BL,J Cell Biol,2001
Special 3 Protein Simulations							SNX3	VPS17 | VPS5			SNX3	VPS17 | VPS5				VPS17:SNX3 and VPS17:VPS5	VPS17:SNX3 and VPS17:VPS5
SNX3:Retromer-(VPS5:VPS17)			non-vacuole cytoplasmic vesicles	PI(3)P	37.2	7.5	0.227299	0.048 | 0.059	33088	11.0775	2.5	100 | 100	*3 Proteins Interacting*		905.223	(17.8,5.4)	(98.9,65.9)	1, 0.01	Unknown KaPPs, both for SNX3: the retromer component, and between VPS5 and VPS17. SNX3 binds to the retromer 5 protein complex (Strochlic et al 2007) and specifically binds to VPS35 (Harrison et al 2012). It also binds to cargo	Strochlic et al 2007 ; Harrison et al PNAS 2012, SNX3 binds retromer complex.	KaPM>100uM for protein VPS5 and VPS17. Used 100 and 300uM

## Sheet: Details of Simulations
																														Eq. 1	Results of simulation							%complexation
																																						no membrane	membrane	no membrane	membrane					% Recruited with the complex involved
Interaction Proteins P1::P2. PI(X,Y)Pz sites listed if variable. Proteins	Function of Interaction		Cell Type	Protein 1 Location	Protein 2 Location	Consensus Location	Volume (um3)	Reaction Volume (um3)	Surface Area (um2)	sigma (um)	Protein 1 Conc. (uM)	Self?	Protein 2 Conc. (uM)	Protein 3 Conc. (uM)	Lipid1	Lipid 1 Conc. (um-2)	M0, Lipid1 Conc (uM)	Lipid2	Lipid 2 Conc. (um-2)	M0, Lipid2 Conc (uM)	KD P1-P2 (uM)	ALT KD P1-P2 (uM)	KD P1-Lipid 1 (uM)	KD P2-Lipid 2(uM)	koff P1-P2 (s-1)	koff P1-Lipid 1(s-1)	koff P2-Lipid 2(s-1)	g factor V/(2.A.s)	*Critical Lipid Conc (uM) e:1%	Enhancement THEORY	Enhancement SIMULATION	%In complex, purely solution binding. #complexes/Min{P01, P02}	% in complex, Full System	Tau0. Equilibration time, purely solution binding (s)	Tau1, Equilibration time, Full system (s)	Stdev of equilibration time (s). Purely solution binding	Stdev of equilibration time (s). Full System	SNX3-VPS17	SNX3-VPS17	VPS5-VPS17	VPS5-VPS17	% of P1 stuck to membrane, no PP interaction	% of P2 stuck to membrane, no PP interaction	% of P1 stuck to membrane WITH PP	% of P2 stuck to membrane WITH PP	SNX3	VPS17	VPS5	Results for M0'=M0*0.1 ---->
OSH2::SWH1,3,5	Beige: Oxysterol binding.	Both are involved in oxysterol binding, and have ankyrin repeats.	Saccharomyces Cerevisiae	cellular bud neck, cortical endoplasmic reticulum, endoplasmic reticulum, nuclear envelope, plasma membrane	early endosome, endoplasmic reticulum, Golgi trans cisterna, nuclear envelope, nucleus-vacuole junction	LYS/VAC membrane	62	37.2	18	0.001	0.038		0.023	-	PI(3,5)P2	9390	7.54	PI(3,5)P2	9390	7.54	1	-	1	3.5	1	1	1	1033.33	694.5	621.393	621.571	3.58431	91.3497	0.943606	0.53366	0.943791	0.475492					88.2442	68.252	94.7284	97.2387
OSH2::SWH1,3,5			Saccharomyces Cerevisiae	cellular bud neck, cortical endoplasmic reticulum, endoplasmic reticulum, nuclear envelope, plasma membrane	early endosome, endoplasmic reticulum, Golgi trans cisterna, nuclear envelope, nucleus-vacuole junction	LYS/VAC membrane	62	37.2	18	0.001	0.038		0.023	-	PI(3,5)P2	9390	7.54	PI(3,5)P2	9390	7.54	0.01	-	1	3.5	1	1	1	1033.33	694.5	621.362	621.54	68.8989	99.893	0.213751	0.236162	0.232826	0.252991					88.2442	68.252	95.3369	99.9599
OSH2::SWH1,4,5			Saccharomyces Cerevisiae	cellular bud neck, cortical endoplasmic reticulum, endoplasmic reticulum, nuclear envelope, plasma membrane	early endosome, endoplasmic reticulum, Golgi trans cisterna, nuclear envelope, nucleus-vacuole junction	PM	62	37.2	76	0.001	0.038		0.023	-	PI(4,5)P2	25000	84.81	PI(4,5)P2	25000	84.81	1	-	1.1	3	1	1	1	244.74	594.3	233.388	233.388	3.58431	81.7529	0.943606	0.235032	0.943791	0.228706					98.719	96.5827	99.3526	99.376
OSH2::SWH1,4,5		Both are involved in oxysterol binding, and have ankyrin repeats.	Saccharomyces Cerevisiae	cellular bud neck, cortical endoplasmic reticulum, endoplasmic reticulum, nuclear envelope, plasma membrane	early endosome, endoplasmic reticulum, Golgi trans cisterna, nuclear envelope, nucleus-vacuole junction	PM	62	37.2	76	0.001	0.038		0.023	-	PI(4,5)P2	25000	84.81	PI(4,5)P2	25000	84.81	0.01	-	1.1	3	1	1	1	244.74	594.3	233.388	233.388	68.8989	99.7164	0.213751	0.139787	0.232826	0.150736					98.719	96.5827	99.4919	99.9901
OSH2::SWH1,4			Saccharomyces Cerevisiae	cellular bud neck, cortical endoplasmic reticulum, endoplasmic reticulum, nuclear envelope, plasma membrane	early endosome, endoplasmic reticulum, Golgi trans cisterna, nuclear envelope, nucleus-vacuole junction	EE	62	37.2	8	0.001	0.038		0.023	-	PI(4)P	36765	13.13	PI(4)P	36765	13.13	1	-	1.3	2.8	1	1	1	2325	555.7	1741.84	1741.81	3.58431	96.4951	0.943606	0.25377	0.943791	0.219428					90.9694	82.4022	96.2365	99.3807
OSH2::SWH1,4		Both are involved in oxysterol binding, and have ankyrin repeats.	Saccharomyces Cerevisiae	cellular bud neck, cortical endoplasmic reticulum, endoplasmic reticulum, nuclear envelope, plasma membrane	early endosome, endoplasmic reticulum, Golgi trans cisterna, nuclear envelope, nucleus-vacuole junction	EE	62	37.2	8	0.001	0.038		0.023	-	PI(4)P	36765	13.13	PI(4)P	36765	13.13	0.01	-	1.3	2.8	1	1	1	2325	555.7	1741.83	1741.81	68.8989	99.9618	0.213751	0.150763	0.232826	0.152193					90.9694	82.4022	96.4262	99.9923
OSH2::SWH1,3			Saccharomyces Cerevisiae	cellular bud neck, cortical endoplasmic reticulum, endoplasmic reticulum, nuclear envelope, plasma membrane	early endosome, endoplasmic reticulum, Golgi trans cisterna, nuclear envelope, nucleus-vacuole junction	Cyt Vesicles	62	37.2	8	0.001	0.038		0.023	-	PI(3)P	33088	11.82	PI(3)P	33088	11.82	1	-	1.5	6.2	1	1	1	2325	1230.5	1350.65	1350.45	3.58431	95.5809	0.943606	0.55128	0.943791	0.52218					88.7102	65.565	95.2295	98.4715
OSH2::SWH1,3		Both are involved in oxysterol binding, and have ankyrin repeats.	Saccharomyces Cerevisiae	cellular bud neck, cortical endoplasmic reticulum, endoplasmic reticulum, nuclear envelope, plasma membrane	early endosome, endoplasmic reticulum, Golgi trans cisterna, nuclear envelope, nucleus-vacuole junction	Cyt Vesicles	62	37.2	8	0.001	0.038		0.023	-	PI(3)P	33088	11.82	PI(3)P	33088	11.82	0.01	-	1.5	6.2	1	1	1	2325	1230.5	1350.62	1350.42	68.8989	99.9507	0.213751	0.237799	0.232826	0.263481					88.7102	65.565	95.5285	99.9801
OSH2::OSH2,3,5			Saccharomyces Cerevisiae	cellular bud neck, cortical endoplasmic reticulum, endoplasmic reticulum, nuclear envelope, plasma membrane	early endosome, endoplasmic reticulum, Golgi trans cisterna, nuclear envelope, nucleus-vacuole junction	LYS/VAC membrane	62	37.2	18	0.001	0.038	Homodimer	0.038	-	PI(3,5)P2	9390	7.54	PI(3,5)P2	9390	7.54	1	-	1	1	1	1	1	1033.33	198.5	804.784	804.908	6.62619	88.0057	0.873786	0.208525	0.874749	0.164849					88.2442	88.2442	98.5886	98.5886
OSH2::OSH2,3,5			Saccharomyces Cerevisiae	cellular bud neck, cortical endoplasmic reticulum, endoplasmic reticulum, nuclear envelope, plasma membrane	early endosome, endoplasmic reticulum, Golgi trans cisterna, nuclear envelope, nucleus-vacuole junction	LYS/VAC membrane	62	37.2	18	0.001	0.038	Homodimer	0.038	-	PI(3,5)P2	9390	7.54	PI(3,5)P2	9390	7.54	0.01	-	1	1	1	1	1	1033.33	198.5	804.772	804.896	69.7134	98.7296	0.125613	0.136347	0.14881	0.178362					88.2442	88.2442	99.849	99.849
OSH2::OSH2,4,5			Saccharomyces Cerevisiae	cellular bud neck, cortical endoplasmic reticulum, endoplasmic reticulum, nuclear envelope, plasma membrane	early endosome, endoplasmic reticulum, Golgi trans cisterna, nuclear envelope, nucleus-vacuole junction	PM	62	37.2	76	0.001	0.038	Homodimer	0.038	-	PI(4,5)P2	25000	84.81	PI(4,5)P2	25000	84.81	1	-	1.1	1.1	1	1	1	244.74	218	238.532	238.533	6.62619	79.1102	0.873786	0.133358	0.874749	0.148452					98.719	98.719	99.7324	99.7324
OSH2::OSH2,4,5			Saccharomyces Cerevisiae	cellular bud neck, cortical endoplasmic reticulum, endoplasmic reticulum, nuclear envelope, plasma membrane	early endosome, endoplasmic reticulum, Golgi trans cisterna, nuclear envelope, nucleus-vacuole junction	PM	62	37.2	76	0.001	0.038	Homodimer	0.038	-	PI(4,5)P2	25000	84.81	PI(4,5)P2	25000	84.81	0.01	-	1.1	1.1	1	1	1	244.74	218	238.532	238.533	69.7134	97.6788	0.125613	0.129823	0.14881	0.272831					98.719	98.719	99.9702	99.9702
OSH2::OSH2,4			Saccharomyces Cerevisiae	cellular bud neck, cortical endoplasmic reticulum, endoplasmic reticulum, nuclear envelope, plasma membrane	early endosome, endoplasmic reticulum, Golgi trans cisterna, nuclear envelope, nucleus-vacuole junction	EE	62	37.2	8	0.001	0.038	Homodimer	0.038	-	PI(4)P	36765	13.13	PI(4)P	36765	13.13	1	-	1.3	1.3	1	1	1	2325	258.1	1924.12	1924.11	6.62619	92.0654	0.873786	0.142059	0.874749	0.116263					90.9694	90.9694	99.2829	99.2829
OSH2::OSH2,4			Saccharomyces Cerevisiae	cellular bud neck, cortical endoplasmic reticulum, endoplasmic reticulum, nuclear envelope, plasma membrane	early endosome, endoplasmic reticulum, Golgi trans cisterna, nuclear envelope, nucleus-vacuole junction	EE	62	37.2	8	0.001	0.038	Homodimer	0.038	-	PI(4)P	36765	13.13	PI(4)P	36765	13.13	0.01	-	1.3	1.3	1	1	1	2325	258.1	1924.12	1924.1	69.7134	99.1765	0.125613	0.0993418	0.14881	0.118977					90.9694	90.9694	99.9252	99.9252
OSH2::OSH2,3			Saccharomyces Cerevisiae	cellular bud neck, cortical endoplasmic reticulum, endoplasmic reticulum, nuclear envelope, plasma membrane	early endosome, endoplasmic reticulum, Golgi trans cisterna, nuclear envelope, nucleus-vacuole junction	Cyt Vesicles	62	37.2	8	0.001	0.038	Homodimer	0.038	-	PI(3)P	33088	11.82	PI(3)P	33088	11.82	1	-	1.5	1.5	1	1	1	2325	297.8	1829.73	1829.6	6.62619	91.8716	0.873786	0.174077	0.874749	0.144299					88.7102	88.7102	99.0811	99.0811
OSH2::OSH2,3			Saccharomyces Cerevisiae	cellular bud neck, cortical endoplasmic reticulum, endoplasmic reticulum, nuclear envelope, plasma membrane	early endosome, endoplasmic reticulum, Golgi trans cisterna, nuclear envelope, nucleus-vacuole junction	Cyt Vesicles	62	37.2	8	0.001	0.038	Homodimer	0.038	-	PI(3)P	33088	11.82	PI(3)P	33088	11.82	0.01	-	1.5	1.5	1	1	1	2325	297.8	1829.72	1829.59	69.7134	99.1555	0.125613	0.115911	0.14881	0.141491					88.7102	88.7102	99.9039	99.9039
SWH1::SWH1,3,5			Saccharomyces Cerevisiae	cellular bud neck, cortical endoplasmic reticulum, endoplasmic reticulum, nuclear envelope, plasma membrane	early endosome, endoplasmic reticulum, Golgi trans cisterna, nuclear envelope, nucleus-vacuole junction	LYS/VAC membrane	62	37.2	18	0.001	0.023	Homodimer	0.023	-	PI(3,5)P2	9390	7.54	PI(3,5)P2	9390	7.54	1	-	3.5	3.5	1	1	1	1033.33	694.5	481.656	481.855	4.21996	80.8959	0.918199	0.623817	0.91861	0.51703					68.252	68.252	93.9174	93.9174
SWH1::SWH1,3,5			Saccharomyces Cerevisiae	cellular bud neck, cortical endoplasmic reticulum, endoplasmic reticulum, nuclear envelope, plasma membrane	early endosome, endoplasmic reticulum, Golgi trans cisterna, nuclear envelope, nucleus-vacuole junction	LYS/VAC membrane	62	37.2	18	0.001	0.023	Homodimer	0.023	-	PI(3,5)P2	9390	7.54	PI(3,5)P2	9390	7.54	0.01	-	3.5	3.5	1	1	1	1033.33	694.5	481.605	481.805	62.9941	97.8983	0.174464	0.34948	0.19832	0.489151					68.252	68.252	99.3121	99.3121
SWH1::SWH1,4,5			Saccharomyces Cerevisiae	cellular bud neck, cortical endoplasmic reticulum, endoplasmic reticulum, nuclear envelope, plasma membrane	early endosome, endoplasmic reticulum, Golgi trans cisterna, nuclear envelope, nucleus-vacuole junction	PM	62	37.2	76	0.001	0.023	Homodimer	0.023	-	PI(4,5)P2	25000	84.81	PI(4,5)P2	25000	84.81	1	-	3	3	1	1	1	244.74	594.3	228.363	228.364	4.21996	73.5411	0.918199	0.222259	0.91861	0.214984					96.5827	96.5827	99.0955	99.0955
SWH1::SWH1,4,5			Saccharomyces Cerevisiae	cellular bud neck, cortical endoplasmic reticulum, endoplasmic reticulum, nuclear envelope, plasma membrane	early endosome, endoplasmic reticulum, Golgi trans cisterna, nuclear envelope, nucleus-vacuole junction	PM	62	37.2	76	0.001	0.023	Homodimer	0.023	-	PI(4,5)P2	25000	84.81	PI(4,5)P2	25000	84.81	0.01	-	3	3	1	1	1	244.74	594.3	228.363	228.364	62.9941	96.9619	0.174464	0.224072	0.19832	0.41787					96.5827	96.5827	99.8957	99.8957
SWH1::SWH1,4			Saccharomyces Cerevisiae	cellular bud neck, cortical endoplasmic reticulum, endoplasmic reticulum, nuclear envelope, plasma membrane	early endosome, endoplasmic reticulum, Golgi trans cisterna, nuclear envelope, nucleus-vacuole junction	EE	62	37.2	8	0.001	0.023	Homodimer	0.023	-	PI(4)P	36765	13.13	PI(4)P	36765	13.13	1	-	2.8	2.8	1	1	1	2325	555.7	1578.87	1578.84	4.21996	88.9341	0.918199	0.289935	0.91861	0.239615					82.4022	82.4022	98.0504	98.0504
SWH1::SWH1,4			Saccharomyces Cerevisiae	cellular bud neck, cortical endoplasmic reticulum, endoplasmic reticulum, nuclear envelope, plasma membrane	early endosome, endoplasmic reticulum, Golgi trans cisterna, nuclear envelope, nucleus-vacuole junction	EE	62	37.2	8	0.001	0.023	Homodimer	0.023	-	PI(4)P	36765	13.13	PI(4)P	36765	13.13	0.01	-	2.8	2.8	1	1	1	2325	555.7	1578.85	1578.82	62.9941	98.8334	0.174464	0.197604	0.19832	0.240609					82.4022	82.4022	99.7927	99.7927
SWH1::SWH1,3			Saccharomyces Cerevisiae	cellular bud neck, cortical endoplasmic reticulum, endoplasmic reticulum, nuclear envelope, plasma membrane	early endosome, endoplasmic reticulum, Golgi trans cisterna, nuclear envelope, nucleus-vacuole junction	Cyt Vesicles	62	37.2	8	0.001	0.023	Homodimer	0.023	-	PI(3)P	33088	11.82	PI(3)P	33088	11.82	1	-	6.2	6.2	1	1	1	2325	1230.5	999.635	999.412	4.21996	86.299	0.918199	0.631148	0.91861	0.554715					65.565	65.565	95.269	95.269
SWH1::SWH1,3			Saccharomyces Cerevisiae	cellular bud neck, cortical endoplasmic reticulum, endoplasmic reticulum, nuclear envelope, plasma membrane	early endosome, endoplasmic reticulum, Golgi trans cisterna, nuclear envelope, nucleus-vacuole junction	Cyt Vesicles	62	37.2	8	0.001	0.023	Homodimer	0.023	-	PI(3)P	33088	11.82	PI(3)P	33088	11.82	0.01	-	6.2	6.2	1	1	1	2325	1230.5	999.578	999.355	62.9941	98.5359	0.174464	0.347727	0.19832	0.484805					65.565	65.565	99.4838	99.4838
KES1::KES1,4,5			Saccharomyces Cerevisiae	cellular bud neck, cortical endoplasmic reticulum, endoplasmic reticulum, nuclear envelope, plasma membrane	early endosome, endoplasmic reticulum, Golgi trans cisterna, nuclear envelope, nucleus-vacuole junction	PM	62	37.2	76	0.001	0.945	Homodimer	0.945	-	PI(4,5)P2	25000	84.81	PI(4,5)P2	25000	84.81	1	-	2.2	2.2	1	1	1	244.74	437.7	232.435	232.436	49.0543	95.3414	0.296906	0.0403563	0.318225	0.0348751					97.4445	97.4445	99.8807	99.8807
KES1::KES1,4,5			Saccharomyces Cerevisiae	cellular bud neck, cortical endoplasmic reticulum, endoplasmic reticulum, nuclear envelope, plasma membrane	early endosome, endoplasmic reticulum, Golgi trans cisterna, nuclear envelope, nucleus-vacuole junction	PM	62	37.2	76	0.001	0.945	Homodimer	0.945	-	PI(4,5)P2	25000	84.81	PI(4,5)P2	25000	84.81	0.01	-	2.2	2.2	1	1	1	244.74	437.7	232.435	232.436	92.9858	99.524	0.011379	0.0132071	0.0193024	0.0271103					97.4445	97.4445	99.9876	99.9876
KES1::KES1,4			Saccharomyces Cerevisiae	cellular bud neck, cortical endoplasmic reticulum, endoplasmic reticulum, nuclear envelope, plasma membrane	early endosome, endoplasmic reticulum, Golgi trans cisterna, nuclear envelope, nucleus-vacuole junction	EE	62	37.2	8	0.001	0.945	Homodimer	0.945	-	PI(4)P	36765	13.13	PI(4)P	36765	13.13	1	-	0.055	0.055	1	1	1	2325	12.8	2304.16	2304.16	49.0543	98.4961	0.296906	0.00654041	0.318225	0.00625952					99.5508	99.5508	99.9932	99.9932
KES1::KES1,4			Saccharomyces Cerevisiae	cellular bud neck, cortical endoplasmic reticulum, endoplasmic reticulum, nuclear envelope, plasma membrane	early endosome, endoplasmic reticulum, Golgi trans cisterna, nuclear envelope, nucleus-vacuole junction	EE	62	37.2	8	0.001	0.945	Homodimer	0.945	-	PI(4)P	36765	13.13	PI(4)P	36765	13.13	0.01	-	0.055	0.055	1	1	1	2325	12.8	2304.16	2304.16	92.9858	99.8486	0.011379	0.00401016	0.0193024	0.00532418					99.5508	99.5508	99.9993	99.9993
BOI2::CLA4,3,5	Blue: Budding	Both are involved in budding-Plasma membrane then has most physiologic significance as target membrane, although both proteins bind PIs promiscuously (Yu et al Mol Cell 2004). Boi2 has two PPI domains, SAM and SH3, CLA4 is a ST Kinase. CLA4 has a long disordered region, ~219-546, that contains putative proline domains. So a possible interactions would be between Boi2's SH3 domain and CLA4's PRD. …	Saccharomyces Cerevisiae	cellular bud, cellular bud neck, site of polarized growth	cellular bud, fungal-type vacuole, nucleus	LYS/VAC membrane	62	37.2	18	0.001	0.025	Homodimer	0.018	-	PI(3,5)P2	9394	7.55	PI(3,5)P2	9394	7.55	1	-	6.6	20.2	1	1	1	1033.33	4007.8	294.091	150.051	2.39792	66.2409	0.959368	2.21314	0.95947	2.0134					53.3129	27.1944	75.4351	75.245
BOI2::CLA4,3,5			Saccharomyces Cerevisiae	cellular bud, cellular bud neck, site of polarized growth	cellular bud, fungal-type vacuole, nucleus	LYS/VAC membrane	62	37.2	18	0.001	0.025		0.018	-	PI(3,5)P2	9394	7.55	PI(3,5)P2	9394	7.55	0.01	-	6.6	20.2	1	1	1	1033.33	4007.8	149.929	149.884	58.9868	99.0776	0.271601	0.766378	0.292073	1.00942					53.3129	27.1944	86.4287	99.1021
BOI2::CLA4,4,5			Saccharomyces Cerevisiae	cellular bud, cellular bud neck, site of polarized growth	cellular bud, fungal-type vacuole, nucleus	PM	62	37.2	75.8	0.001	0.025		0.018	-	PI(4,5)P2	25000	84.54	PI(4,5)P2	25000	84.54	1	-	9.7	20.4	1	1	1	245.53	4041.1	177.586	177.618	2.39792	69.0633	0.959368	0.570229	0.95947	0.44495					89.7047	80.5576	94.8203	93.9788
BOI2::CLA4,4,5		Both are involved in budding-Plasma membrane then has most physiologic significance as target membrane, although both proteins bind PIs promiscuously (Yu et al Mol Cell 2004). Boi2 has two PPI domains, SAM and SH3, CLA4 is a ST Kinase. CLA4 has a long disordered region, ~219-546, that contains putative proline domains. So a possible interactions would be between Boi2's SH3 domain and CLA4's PRD. …	Saccharomyces Cerevisiae	cellular bud, cellular bud neck, site of polarized growth	cellular bud, fungal-type vacuole, nucleus	PM	62	37.2	75.8	0.001	0.025		0.018	-	PI(4,5)P2	25000	84.54	PI(4,5)P2	25000	84.54	0.01	-	9.7	20.4	1	1	1	245.53	4041.1	177.585	177.617	58.9868	99.2177	0.271601	0.366608	0.292073	0.40095					89.7047	80.5576	97.0523	99.8368
CLA4::SKM1,3,5		Both are S/T kinases, the kinases domains could interact with one another. CLA4 is involved in budding and cytokinesis, SKM1 may also be involved in morphological changes.	Saccharomyces Cerevisiae	cellular bud, fungal-type vacuole, nucleus	nucleus, plasma membrane	LYS/VAC membrane	62	37.2	18	0.001	0.018		0.001	-	PI(3,5)P2	9394	7.55	PI(3,5)P2	9394	7.55	1	-	20.2	6.4	1	1	1	1033.33	4007.7	152.861	152.817	1.76647	72.5265	0.981385	1.45799	0.98143	1.06529					27.1944	54.1201	30.1108	87.2296
CLA4::SKM1,3,5			Saccharomyces Cerevisiae	cellular bud, fungal-type vacuole, nucleus	nucleus, plasma membrane	LYS/VAC membrane	62	37.2	18	0.001	0.018		0.001	-	PI(3,5)P2	9394	7.55	PI(3,5)P2	9394	7.55	0.01	-	20.2	6.4	1	1	1	1033.33	4007.7	152.854	152.809	63.4575	99.6166	0.356545	0.558674	0.358569	0.581378					27.1944	54.1201	31.2026	99.6061
CLA4::SKM1,4,5			Saccharomyces Cerevisiae	cellular bud, fungal-type vacuole, nucleus	nucleus, plasma membrane	PM	62	37.2	75.8	0.001	0.018		0.001	-	PI(4,5)P2	25000	84.54	PI(4,5)P2	25000	84.54	1	-	20.4	3.9	1	1	1	245.53	4041.1	189.185	189.213	1.76647	76.5314	0.981385	0.571248	0.98143	0.427932					80.5576	95.5902	81.393	98.962
CLA4::SKM1,4,5		Both are S/T kinases, the kinases domains could interact with one another. CLA4 is involved in budding and cytokinesis, SKM1 may also be involved in morphological changes.	Saccharomyces Cerevisiae	cellular bud, fungal-type vacuole, nucleus	nucleus, plasma membrane	PM	62	37.2	75.8	0.001	0.018		0.001	-	PI(4,5)P2	25000	84.54	PI(4,5)P2	25000	84.54	0.01	-	20.4	3.9	1	1	1	245.53	4041.1	189.185	189.213	63.4575	99.6901	0.356545	0.288819	0.358569	0.233682					80.5576	95.5902	81.6429	99.9818
BOI2::BEM1		Both involved in bud formation, which would occur at the plasma membrane. Since BEM1 only binds PI(3)P, if there's no population of PI3P, we can't evaluate this at the PM. Only at the vacuole (which is not necessarily physiologic for BOI2 ..) The 2nd SH3 domain of BEM1 binds to PRDs on BOI1 and BOI2, (Bender, L et al J Cell Sci 1996). Both have SH3 domains, so could interact if one has a PRD. BEM…	Saccharomyces Cerevisiae	cellular bud, cellular bud neck, site of polarized growth	cellular bud neck, cellular bud tip, incipient cellular bud site, site of polarized growth	Vacuole OM*	62	37.2	18	0.001	0.025		0.046	-	PI(3)P	63439	50.97	PI(3)P	63439	50.97	1	-	19.5	100	1	1	1	1033.33	19840.2	252.84	252.856	4.29937	86.0904	0.935114	1.04259	0.93535	0.853649					72.3215	33.7549	96.0858	64.7078
BOI2::BEM1			Saccharomyces Cerevisiae	cellular bud, cellular bud neck, site of polarized growth	cellular bud neck, cellular bud tip, incipient cellular bud site, site of polarized growth	Vacuole OM*	62	37.2	18	0.001	0.025		0.046	-	PI(3)P	63439	50.97	PI(3)P	63439	50.97	0.01	-	19.5	100	1	1	1	1033.33	19840.2	252.825	252.841	73.4336	99.8124	0.188919	0.27843	0.206202	0.30914					72.3215	33.7549	99.8756	69.6432
BOI2::BEM1			Saccharomyces Cerevisiae	cellular bud, cellular bud neck, site of polarized growth	cellular bud neck, cellular bud tip, incipient cellular bud site, site of polarized growth	Vacuole OM*	62	37.2	18	0.001	0.025		0.046	-	PI(3)P	63439	50.97	PI(3)P	63439	50.97	1	-	19.5	300	1	1	1	1033.33	59520.6	109.326	109.335	4.29937	74.8895	0.935114	2.17855	0.93535	1.89689					72.3215	14.521	92.8853	49.2184
BOI1::BEM1			Saccharomyces Cerevisiae	cellular bud, cellular bud neck, site of polarized growth	cellular bud neck, cellular bud tip, incipient cellular bud site, site of polarized growth	Vacuole OM*	62	37.2	18	0.001	0.025		0.046	-	PI(3)P	63439	50.97	PI(3)P	63439	50.97	1	-	20	100	1	1	1	1033.33	19840.2	251.064	251.081	4.29937	86.015	0.935114	1.04772	0.93535	0.857703					71.8119	33.7549	95.9921	64.6798
BOI1::BEM1		Both involved in bud formation, which would occur at the plasma membrane. The 2nd SH3 domain of BEM1 binds to PRDs on BOI1 and BOI2, (Bender, L et al J Cell Sci 1996). Both have SH3 domains, so could interact if one has a PRD. BEM1, however, only binds PI(3)P, and weakly, so it may need to be stabilized by many partners to recruit to the membrane. BOI2 binds to PI(4,5)P2 relatively strongly, it i…	Saccharomyces Cerevisiae	cellular bud, cellular bud neck, site of polarized growth	cellular bud neck, cellular bud tip, incipient cellular bud site, site of polarized growth	Vacuole OM*	62	37.2	18	0.001	0.025		0.046	-	PI(3)P	63439	50.97	PI(3)P	63439	50.97	0.01	-	20	100	1	1	1	1033.33	19840.2	251.049	251.066	73.4336	99.8111	0.188919	0.280397	0.206202	0.313118					71.8119	33.7549	99.8724	69.6417
BOI1::BEM1			Saccharomyces Cerevisiae	cellular bud, cellular bud neck, site of polarized growth	cellular bud neck, cellular bud tip, incipient cellular bud site, site of polarized growth	Vacuole OM*	62	37.2	18	0.001	0.025		0.046	-	PI(3)P	63439	50.97	PI(3)P	63439	50.97	1	-	20	300	1	1	1	1033.33	59520.6	108.563	108.571	4.29937	74.7769	0.935114	2.18172	0.93535	1.89974					71.8119	14.521	92.7217	49.164
BEM1::CLA4		Both proteins involved in bud formation, BEM1 has an SH3 domain, which could potentially bind to a putative PRD on CLA4.	Saccharomyces Cerevisiae	cellular bud neck, cellular bud tip, incipient cellular bud site, site of polarized growth	cellular bud, fungal-type vacuole, nucleus	Vacuole OM*	62	37.2	18	0.001	0.046		0.018	-	PI(3)P	63439	50.97	PI(3)P	63439	50.97	1	-	100	100	1	1	1	1033.33	19840.2	118.547	118.558	4.32647	79.0237	0.940882	2.01935	0.941056	1.82872					33.7549	33.759	54.1185	85.8097
BEM1::CLA4			Saccharomyces Cerevisiae	cellular bud neck, cellular bud tip, incipient cellular bud site, site of polarized growth	cellular bud, fungal-type vacuole, nucleus	Vacuole OM*	62	37.2	18	0.001	0.046		0.018	-	PI(3)P	63439	50.97	PI(3)P	63439	50.97	0.01	-	100	100	1	1	1	1033.33	19840.2	118.532	118.543	76.3366	99.7002	0.188348	0.425459	0.201031	0.663175					33.7549	33.759	59.4477	99.4322
BEM1::CLA4			Saccharomyces Cerevisiae	cellular bud neck, cellular bud tip, incipient cellular bud site, site of polarized growth	cellular bud, fungal-type vacuole, nucleus	Vacuole OM*	62	37.2	18	0.001	0.046		0.018	-	PI(3)P	63439	50.97	PI(3)P	63439	50.97	1	-	300	300	1	1	1	1033.33	59520.6	22.7558	22.7585	4.32647	46.1714	0.940882	3.8136	0.941056	3.63711					14.521	14.522	29.3819	52.5037
BOI2::BEM1	Mauve: Vacuole Fusion/Morphogenesis	Also, BEM1 is involved Vacuole fusion, which may be another( or the only) role of its PI(3)P binding. BOI2, although it can bind PI(3)P, does not appear to function at the vacuole. However, we can still estimate, if they did both bind at the vacuole, what their enhancement would be.	Saccharomyces Cerevisiae			Vacuole OM*	62	37.2	18	0.001	0.025		0.046	-	PI(3)P	63439	50.97	PI(3)P	63439	50.97	1	-	19.5	100	1	1	1	1033.33	19840.2	252.84	252.856	4.29937	86.0904	0.935114	1.04259	0.93535	0.853649					72.3215	33.7549	96.0858	64.7078
BOI2::BEM1			Saccharomyces Cerevisiae			Vacuole OM*	62	37.2	18	0.001	0.025		0.046	-	PI(3)P	63439	50.97	PI(3)P	63439	50.97	0.01	-	19.5	100	1	1	1	1033.33	19840.2	252.825	252.841	73.4336	99.8124	0.188919	0.27843	0.206202	0.30914					72.3215	33.7549	99.8756	69.6432
BOI2::BEM1			Saccharomyces Cerevisiae			Vacuole OM*	62	37.2	18	0.001	0.025		0.046	-	PI(3)P	63439	50.97	PI(3)P	63439	50.97	1	-	19.5	300	1	1	1	1033.33	59520.6	109.326	109.335	4.29937	74.8895	0.935114	2.17855	0.93535	1.89689					72.3215	14.521	92.8853	49.2184
BOI2::CLA4		see above	Saccharomyces Cerevisiae			Vacuole OM*	62	37.2	18	0.001	0.025		0.018	-	PI(3)P	63439	50.97	PI(3)P	63439	50.97	1	-	19.5	100	1	1	1	1033.33	19840.2	252.919	252.935	2.39792	74.5499	0.959368	1.7151	0.95947	1.58401					72.3215	33.759	87.1365	83.0845
BOI2::CLA4			Saccharomyces Cerevisiae			Vacuole OM*	62	37.2	18	0.001	0.025		0.018	-	PI(3)P	63439	50.97	PI(3)P	63439	50.97	0.01	-	19.5	100	1	1	1	1033.33	19840.2	252.899	252.916	58.9868	99.4462	0.271601	0.593635	0.292073	0.732629					72.3215	33.759	92.0856	99.5609
BOI2::CLA4			Saccharomyces Cerevisiae			Vacuole OM*	62	37.2	18	0.001	0.025		0.018	-	PI(3)P	63439	50.97	PI(3)P	63439	50.97	1	-	19.5	300	1	1	1	1033.33	59520.6	109.357	109.366	2.39792	60.637	0.959368	3.54091	0.95947	3.37205					72.3215	14.522	84.3086	66.2195
VAM7::BEM1		VAM7 is involved in vacoule morphogenesis (possiblye fusion), and Wu, JBC 2006 indicate that BEM1 plays a role as well.	Saccharomyces Cerevisiae			Vacuole OM*	62	37.2	18	0.001	0.009		0.046	-	PI(3)P	63439	50.97	PI(3)P	63439	50.97	1	-	2.5	100	1	1	1	1033.33	19840.2	333.099	333.115	4.36181	92.6181	0.948396	0.535568	0.948487	0.421982					95.3237	33.7549	99.6461	45.7535
VAM7::BEM1			Saccharomyces Cerevisiae			Vacuole OM*	62	37.2	18	0.001	0.009		0.046	-	PI(3)P	63439	50.97	PI(3)P	63439	50.97	0.01	-	2.5	100	1	1	1	1033.33	19840.2	333.096	333.113	79.5261	99.9189	0.184552	0.157191	0.190771	0.130101					95.3237	33.7549	99.9869	46.6995
VAM7::BEM1			Saccharomyces Cerevisiae			Vacuole OM*	62	37.2	18	0.001	0.009		0.046	-	PI(3)P	63439	50.97	PI(3)P	63439	50.97	1	-	2.5	300	1	1	1	1033.33	59520.6	143.856	143.865	4.36181	84.6662	0.948396	1.12864	0.948487	0.932247					95.3237	14.521	99.2593	28.6737
VPS17::MVP1	Putative. No direct binding evidence.	Both are involved at the vacuole, or endosome, only one highthrouput study indicating that they bind directly.	Saccharomyces Cerevisiae	endosome, retromer complex, retromer, tubulation complex	cytoplasm, endosome, nucleus	Endosomal membrane	62	37.2	8	0.001	0.048		0.072	-	PI(3)P	33088	11.82	PI(3)P	33088	11.82	1	-	100	100	1	1	1	2325	19845.7	26.7398	26.7249	6.44638	54.9426	0.896573	5.22839	0.897196	5.42866					10.5665	10.5645	58.0371	42.1984
VPS17::MVP1			Saccharomyces Cerevisiae	endosome, retromer complex, retromer, tubulation complex	cytoplasm, endosome, nucleus	Endosomal membrane	62	37.2	8	0.001	0.048		0.072	-	PI(3)P	33088	11.82	PI(3)P	33088	11.82	0.01	-	100	100	1	1	1	2325	19845.7	26.5991	26.5841	77.6441	98.5011	0.137918	1.0761	0.157118	2.59328					10.5665	10.5645	95.6898	67.2906
VPS17::MVP1			Saccharomyces Cerevisiae	endosome, retromer complex, retromer, tubulation complex	cytoplasm, endosome, nucleus	Endosomal membrane	62	37.2	8	0.001	0.048		0.072	-	PI(3)P	33088	11.82	PI(3)P	33088	11.82	1	-	300	300	1	1	1	2325	59536.8	4.32876	4.32667	6.44638	21.115	0.896573	5.02147	0.897196	6.03157					3.79009	3.78981	19.5817	14.3156
BEM3::CLA4	Putative, Y2H suggests it may be bridged (indirect)	Both proteina also involved in Bud formation, Y2H found the two proteins boudn together, but suggest that it could be bridged via the CDC42 protein, because CDC42 binds each of CLA4 and BEM3, but it would have to use distinct sites for each protein. Could PBD domain of CLA4 interact with a domain on BEM3 directly?	Saccharomyces Cerevisiae	cell cortex, cellular bud tip, cytoplasm, incipient cellular bud site, mating projection tip	cellular bud, fungal-type vacuole, nucleus	Vacuole OM*	62	37.2	18	0.001	0.027		0.018	-	PI(3)P	63439	50.97	PI(3)P	63439	50.97	1	-	100	100	1	1	1	1033.33	19840.2	118.577	118.588	2.58488	64.581	0.957577	2.11218	0.957685	1.84625					33.7577	33.759	62.1139	76.2959
BEM3::CLA4			Saccharomyces Cerevisiae	cell cortex, cellular bud tip, cytoplasm, incipient cellular bud site, mating projection tip	cellular bud, fungal-type vacuole, nucleus	Vacuole OM*	62	37.2	18	0.001	0.027		0.018	-	PI(3)P	63439	50.97	PI(3)P	63439	50.97	0.01	-	100	100	1	1	1	1033.33	19840.2	118.552	118.563	61.4484	99.088	0.262178	0.794694	0.282056	1.0954					33.7577	33.759	77.2681	99.0289
BEM3::CLA4			Saccharomyces Cerevisiae	cell cortex, cellular bud tip, cytoplasm, incipient cellular bud site, mating projection tip	cellular bud, fungal-type vacuole, nucleus	Vacuole OM*	62	37.2	18	0.001	0.027		0.018	-	PI(3)P	63439	50.97	PI(3)P	63439	50.97	1	-	300	300	1	1	1	1033.33	59520.6	22.7608	22.7634	2.58488	32.4986	0.957577	3.70107	0.957685	3.41394					14.5217	14.522	32.3441	41.2564
SLA2::CLA4,4,5	Turquoise:Cell polarization		Saccharomyces Cerevisiae	actin cortical patch, incipient cellular bud site	cellular bud, fungal-type vacuole, nucleus	PM	62	37.2	75.8	0.001	0.174		0.018	-	PI(4,5)P2	25000	84.54	PI(4,5)P2	25000	84.54	1	-	0.27	20.4	1	1	1	245.53	4041.2	197.161	197.184	14.6296	96.8625	0.841715	0.275008	0.842183	0.244442					99.681	80.5576	99.713	99.389
SLA2::CLA4,4,5			Saccharomyces Cerevisiae	actin cortical patch, incipient cellular bud site	cellular bud, fungal-type vacuole, nucleus	PM	62	37.2	75.8	0.001	0.174		0.018	-	PI(4,5)P2	25000	84.54	PI(4,5)P2	25000	84.54	0.01	-	0.27	20.4	1	1	1	245.53	4041.2	197.161	197.184	94.0147	99.9675	0.0566634	0.0514629	0.0580418	0.0505694					99.681	80.5576	99.7141	99.9934
VPS17::SNX4	Green: assembly on endosomes, retromer plus SNX proteins.	VPS17 is part of a retromer complex that may assemble on membranes to promote vesicle formation. Again, possibly the C terminal domains interact, VPS17 has a CC domain, SNX4 also has a C terminal CC domain that could mediate the interaction, same as VPS5-VPS17.	Saccharomyces Cerevisiae	endosome, retromer complex, retromer, tubulation complex	cytosol, early endosome, extrinsic component of membrane, pre-autophagosomal structure	non-vacuole cytoplasmic vesicles	62	37.2	7.5	0.001	0.048		0.066	-	PI(3)P	33088	11.08	PI(3)P	33088	11.08	1	-	100	100	1	1	1	2480	19845.9	25.4494	25.4401	5.9398	51.2857	0.901126	5.41226	0.901705	5.62834					9.97091	9.96946	54.4871	42.335
VPS17::SNX4			Saccharomyces Cerevisiae	endosome, retromer complex, retromer, tubulation complex	cytosol, early endosome, extrinsic component of membrane, pre-autophagosomal structure	non-vacuole cytoplasmic vesicles	62	37.2	7.5	0.001	0.048		0.066	-	PI(3)P	33088	11.08	PI(3)P	33088	11.08	1	-	300	300	1	1	1	2480	59537.6	4.13542	4.13413	5.9398	19.0337	0.901126	4.98277	0.901705	6.01604					3.56125	3.56106	17.6302	13.7917
VPS17::SNX4			Saccharomyces Cerevisiae	endosome, retromer complex, retromer, tubulation complex	cytosol, early endosome, extrinsic component of membrane, pre-autophagosomal structure	non-vacuole cytoplasmic vesicles	62	37.2	7.5	0.001	0.048		0.066	-	PI(3)P	33088	11.08	PI(3)P	33088	11.08	0.01	-	100	100	1	1	1	2480	19845.9	25.2948	25.2855	75	97.9588	0.146137	1.3239	0.167	3.069					9.97091	9.96946	95.0157	71.8017
SNX4::SNX41			Saccharomyces Cerevisiae	cytosol, early endosome, extrinsic component of membrane, pre-autophagosomal structure	endosome	non-vacuole cytoplasmic vesicles	62	37.2	7.5	0.001	0.066		0.016	-	PI(3)P	33088	11.08	PI(3)P	33088	11.08	1	-	100	100	1	1	1	2480	19845.9	25.5669	25.5576	6.10533	59.1022	0.925467	5.44896	0.925678	5.57221					9.96946	9.9735	22.4002	61.2977
SNX4::SNX41			Saccharomyces Cerevisiae	cytosol, early endosome, extrinsic component of membrane, pre-autophagosomal structure	endosome	non-vacuole cytoplasmic vesicles	62	37.2	7.5	0.001	0.066		0.016	-	PI(3)P	33088	11.08	PI(3)P	33088	11.08	0.01	-	100	100	1	1	1	2480	19845.9	25.5225	25.5132	84.0147	99.2241	0.139613	0.71159	0.146356	1.93022					9.96946	9.9735	30.8417	96.1471
SNX4::SNX41			Saccharomyces Cerevisiae	cytosol, early endosome, extrinsic component of membrane, pre-autophagosomal structure	endosome	non-vacuole cytoplasmic vesicles	62	37.2	7.5	0.001	0.066		0.016	-	PI(3)P	33088	11.08	PI(3)P	33088	11.08	1	-	300	300	1	1	1	2480	59537.6	4.1407	4.13942	6.10533	20.6068	0.925467	4.70587	0.925678	5.46729					3.56106	3.56161	7.254	18.802
VPS5::VPS17		VPS17 is part of a retromer complex that may assemble on membranes to promote vesicle formation. VPS17 and VPS5 bind via their C terminal coiled coil domains, independently of their membrane targeting domains (seaman et al)	Saccharomyces Cerevisiae	cytosol, endosome, retromer complex, retromer, tubulation complex	endosome, retromer complex, retromer, tubulation complex	non-vacuole cytoplasmic vesicles	62	37.2	7.5	0.001	0.059		0.048	-	PI(3)P	33088	11.08	PI(3)P	33088	11.08	1	-	100	100	1	1	1	2480	19845.9	25.4636	25.4543	5.34209	47.8423	0.906492	5.38334	0.90702	5.57305					9.97003	9.97091	43.7483	51.4979
VPS5::VPS17			Saccharomyces Cerevisiae	cytosol, endosome, retromer complex, retromer, tubulation complex	endosome, retromer complex, retromer, tubulation complex	non-vacuole cytoplasmic vesicles	62	37.2	7.5	0.001	0.059		0.048	-	PI(3)P	33088	11.08	PI(3)P	33088	11.08	0.01	-	100	100	1	1	1	2480	19845.9	25.301	25.2917	71.2603	96.9278	0.15581	1.62548	0.178369	3.5728					9.97003	9.97091	78.4184	94.1207
VPS5::VPS17			Saccharomyces Cerevisiae	cytosol, endosome, retromer complex, retromer, tubulation complex	endosome, retromer complex, retromer, tubulation complex	non-vacuole cytoplasmic vesicles	62	37.2	7.5	0.001	0.059		0.048	-	PI(3)P	33088	11.08	PI(3)P	33088	11.08	1	-	300	300	1	1	1	2480	59537.6	4.13621	4.13492	5.34209	17.3261	0.906492	4.90987	0.90702	5.88505					3.56113	3.56125	13.9799	16.3686
VPS5::VPS17			Saccharomyces Cerevisiae	cytosol, endosome, retromer complex, retromer, tubulation complex	endosome, retromer complex, retromer, tubulation complex	non-vacuole cytoplasmic vesicles	62	37.2	7.5	0.001	0.059		0.048	-	PI(3)P	33088	11.08	PI(3)P	33088	11.08	0.01	-	300	300	1	1	1	2480	59537.6	4.10941	4.10813	71.2603	87.4807	0.15581	2.15538	0.178369	6.02399					3.56113	3.56125	56.0723	68.1108
VPS5::VPS17			Saccharomyces Cerevisiae	cytosol, endosome, retromer complex, retromer, tubulation complex	endosome, retromer complex, retromer, tubulation complex	non-vacuole cytoplasmic vesicles	62	37.2	7.5	0.001	0.059		0.048	-	PI(3)P	33088	11.08	PI(3)P	33088	11.08	0.01	-	100	100	1	1	1	2480	19845.9	25.301	25.2917	71.2603	96.9278	0.15581	1.62548	0.178369	3.5728					9.97003	9.97091	78.4184	94.1207
SNX3::VPS17		VPS17 is part of a retromer complex that may assemble on membranes to promote vesicle formation. VPS17 and VPS5 bind via their C terminal coiled coil domains, independently of their membrane targeting domains (seaman et al)	Saccharomyces Cerevisiae	cytosol, endosome, retromer complex, retromer, tubulation complex	endosome, retromer complex, retromer, tubulation complex	non-vacuole cytoplasmic vesicles	62	37.2	7.5	0.001	0.227		0.048	-	PI(3)P	33088	11.08	PI(3)P	33088	11.08	1	-	2.5	100	1	1	1	2480	19846.1	198.012	197.966	17.9249	97.2748	0.792337	3.22065	0.793689	3.32613					81.3368	9.97091	85.0942	97.4582
SNX3::VPS17			Saccharomyces Cerevisiae	cytosol, endosome, retromer complex, retromer, tubulation complex	endosome, retromer complex, retromer, tubulation complex	non-vacuole cytoplasmic vesicles	62	37.2	7.5	0.001	0.227		0.048	-	PI(3)P	33088	11.08	PI(3)P	33088	11.08	0.01	-	2.5	100	1	1	1	2480	19846.1	197.984	197.938	94.7782	99.9718	0.0463045	0.0582533	0.0488235	0.0845181					81.3368	9.97091	85.1991	99.8891
SNX3::VPS17			Saccharomyces Cerevisiae	cytosol, endosome, retromer complex, retromer, tubulation complex	endosome, retromer complex, retromer, tubulation complex	non-vacuole cytoplasmic vesicles	62	37.2	7.5	0.001	0.227		0.048	-	PI(3)P	33088	11.08	PI(3)P	33088	11.08	1	-	2.5	300	1	1	1	2480	59537.8	71.2732	71.2559	17.9249	92.8567	0.792337	4.02479	0.793689	4.18274					81.3368	3.56125	84.8902	92.8701
SNX3::VPS17			Saccharomyces Cerevisiae	cytosol, endosome, retromer complex, retromer, tubulation complex	endosome, retromer complex, retromer, tubulation complex	non-vacuole cytoplasmic vesicles	62	37.2	7.5	0.001	0.227		0.048	-	PI(3)P	33088	11.08	PI(3)P	33088	11.08	0.01	-	2.5	300	1	1	1	2480	59537.8	71.2445	71.2272	94.7782	99.9216	0.0463045	0.0589647	0.0488235	0.086824					81.3368	3.56125	85.1621	99.6706
ATG20::SNX4			Saccharomyces Cerevisiae	endosome, extrinsic component of membrane, pre-autophagosomal structure	cytosol, early endosome, extrinsic component of membrane, pre-autophagosomal structure	non-vacuole cytoplasmic vesicles	62	37.2	7.5	0.001	0.023		0.066	-	PI(3)P	33088	11.08	PI(3)P	33088	11.08	1	-	100	100	1	1	1	2480	19845.9	25.5382	25.5289	6.06838	57.4075	0.920042	5.43156	0.920339	5.57336					9.97293	9.96946	59.8206	27.3273
ATG20::SNX4			Saccharomyces Cerevisiae	endosome, extrinsic component of membrane, pre-autophagosomal structure	cytosol, early endosome, extrinsic component of membrane, pre-autophagosomal structure	non-vacuole cytoplasmic vesicles	62	37.2	7.5	0.001	0.023		0.066	-	PI(3)P	33088	11.08	PI(3)P	33088	11.08	0.01	-	100	100	1	1	1	2480	19845.9	25.4719	25.4626	82.4662	99.0992	0.142608	0.795861	0.152663	2.08886					9.97293	9.96946	96.0316	39.9375
ATG20::SNX4			Saccharomyces Cerevisiae	endosome, extrinsic component of membrane, pre-autophagosomal structure	cytosol, early endosome, extrinsic component of membrane, pre-autophagosomal structure	non-vacuole cytoplasmic vesicles	62	37.2	7.5	0.001	0.023		0.066	-	PI(3)P	33088	11.08	PI(3)P	33088	11.08	1	-	300	300	1	1	1	2480	59537.6	4.13948	4.1382	6.06838	20.2457	0.920042	4.76666	0.920339	5.59108					3.56153	3.56106	18.5329	8.77651
Three Proteins
SNX3::Retromer-VPS5		SNX3 binds to the retromer 5 protein complex (Strochlic et al 2007) and specifically binds to VPS35 (Harrison et al 2012). It also binds to cargo	Saccharomyces Cerevisiae			non-vacuole cytoplasmic vesicles	62	37.2	7.5	0.001	0.227		0.048	0.059	PI(3)P	33088	11.08	PI(3)P	33088	11.08	1	1	2.5	100	1	1	1											17.8	98.9	5.4	65.9					85.2	98.7	58.4
SNX3::Retromer-VPS5		SNX3 binds to the retromer 5 protein complex (Strochlic et al 2007) and specifically binds to VPS35 (Harrison et al 2012). It also binds to cargo	Saccharomyces Cerevisiae			non-vacuole cytoplasmic vesicles	62	37.2	7.5	0.001	0.227		0.048	0.059	PI(3)P	33088	11.08	PI(3)P	33088	11.08	0.01	1	2.5	100	1	1	1											94.7	100	5.3	53.7					85.3	99.6	50.2
SNX3::Retromer-VPS5		SNX3 binds to the retromer 5 protein complex (Strochlic et al 2007) and specifically binds to VPS35 (Harrison et al 2012). It also binds to cargo	Saccharomyces Cerevisiae			non-vacuole cytoplasmic vesicles	62	37.2	7.5	0.001	0.227		0.048	0.059	PI(3)P	33088	11.08	PI(3)P	33088	11.08	1	0.01	2.5	100	1	1	1											18.1	99.6	71.4	88.1					85.4	99.5	82.6
SNX3::Retromer-VPS5		SNX3 binds to the retromer 5 protein complex (Strochlic et al 2007) and specifically binds to VPS35 (Harrison et al 2012). It also binds to cargo	Saccharomyces Cerevisiae			non-vacuole cytoplasmic vesicles	62	37.2	7.5	0.001	0.227		0.048	0.059	PI(3)P	33088	11.08	PI(3)P	33088	11.08	0.01	0.01	2.5	100	1	1	1											94.7	100	71.2	87.5					85.5	99.7	82.7
SNX3::Retromer-VPS5		SNX3 binds to the retromer 5 protein complex (Strochlic et al 2007) and specifically binds to VPS35 (Harrison et al 2012). It also binds to cargo	Saccharomyces Cerevisiae			non-vacuole cytoplasmic vesicles	62	37.2	7.5	0.001	0.227		0.048	0.059	PI(3)P	33088	11.08	PI(3)P	33088	11.08	1	1	2.5	300	1	1	1											17.8	97.4	5.4	58.1					85.29	96.62	49.23
SNX3::Retromer-VPS5		SNX3 binds to the retromer 5 protein complex (Strochlic et al 2007) and specifically binds to VPS35 (Harrison et al 2012). It also binds to cargo	Saccharomyces Cerevisiae			non-vacuole cytoplasmic vesicles	62	37.2	7.5	0.001	0.227		0.048	0.059	PI(3)P	33088	11.08	PI(3)P	33088	11.08	0.01	1	2.5	300	1	1	1											94.7	100	5.3	51.7					85.33	98.9	44.52
SNX3::Retromer-VPS5		SNX3 binds to the retromer 5 protein complex (Strochlic et al 2007) and specifically binds to VPS35 (Harrison et al 2012). It also binds to cargo	Saccharomyces Cerevisiae			non-vacuole cytoplasmic vesicles	62	37.2	7.5	0.001	0.227		0.048	0.059	PI(3)P	33088	11.08	PI(3)P	33088	11.08	1	0.01	2.5	300	1	1	1											18.1	99.4	71.4	90.8					85.39	98.67	81.01
SNX3::Retromer-VPS5		SNX3 binds to the retromer 5 protein complex (Strochlic et al 2007) and specifically binds to VPS35 (Harrison et al 2012). It also binds to cargo	Saccharomyces Cerevisiae			non-vacuole cytoplasmic vesicles	62	37.2	7.5	0.001	0.227		0.048	0.059	PI(3)P	33088	11.08	PI(3)P	33088	11.08	0.01	0.01	2.5	300	1	1	1											94.7	100	71.2	90.9					85.39	99.01	81.5
[truncated: 13 more columns]
